# Supplementary material for: Polydopamine-Coated Polycaprolactone Electrospun Nanofiber Membrane Loaded with Thrombin for Wound Hemostasis
Source: Preprints.org preprint supplement (doi:10.20944/preprints202306.1698.v1), 2023-06-25
Supplement: Supplementary file 3 [file supplementary]

**Supplementary Materials**

Figure S1. SEM images of Thrombin loaded onto PCL and PCL-PDA fibrous membranes.
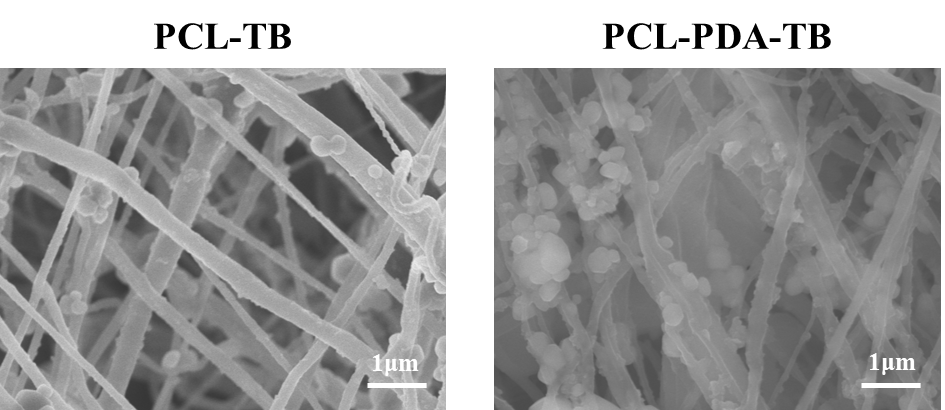


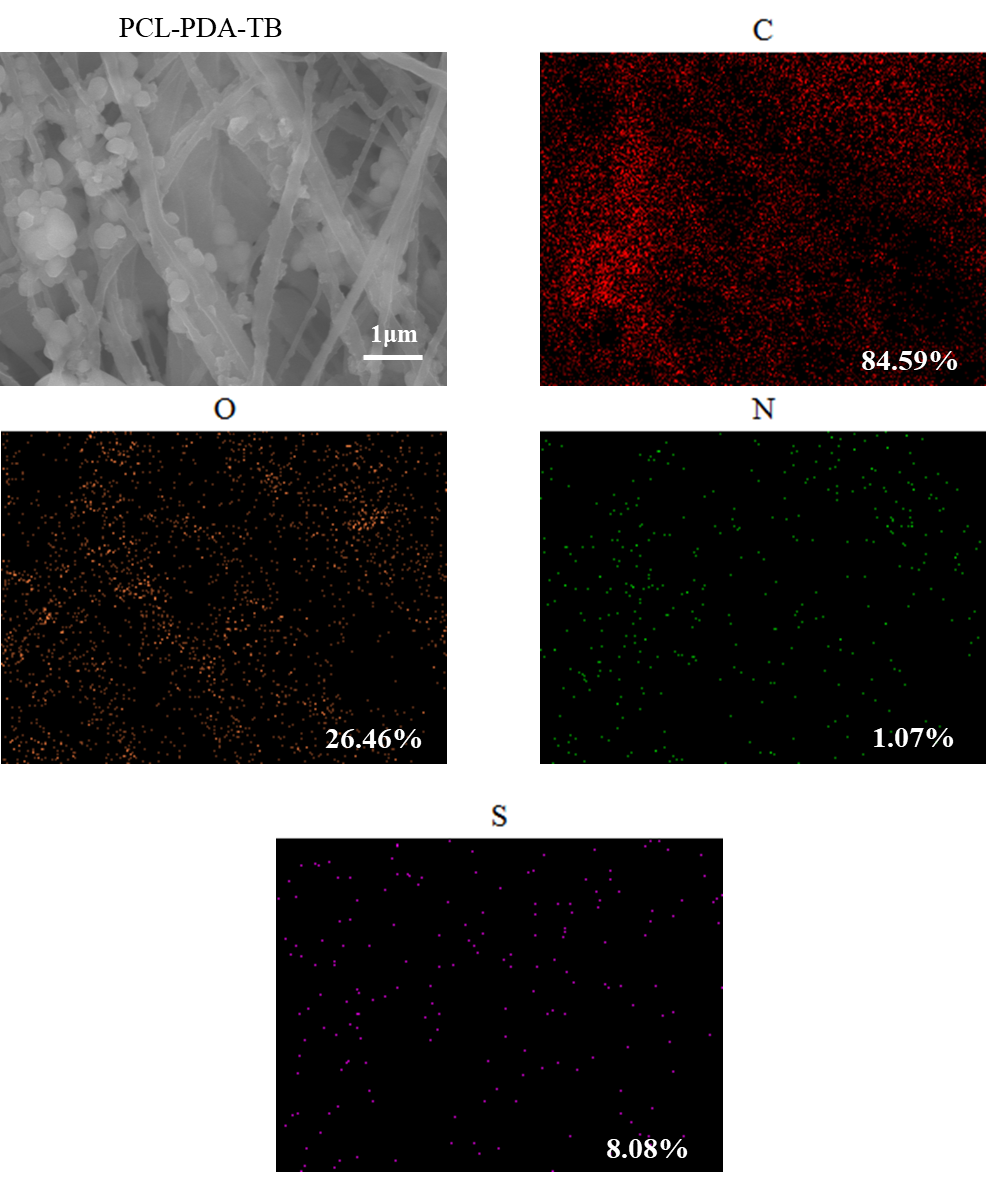


Figure S2. SEM and EDS elemental mapping images of PCL-PDA-TB fibrous membranes.
